# Supplementary material
Source: PubMed Central journal article supplement (PMC3174090)
Supplement: NIHMS322659-supplement-SI.pdf [file NIHMS322659-supplement-SI.pdf]

# Supporting Information for

## Sortase A-Catalyzed Peptide Cyclization for the Synthesis of Macrocyclic Peptides and Glycopeptides

Zhimeng Wu, Xueqing Guo, and Zhongwu Guo\*

*Department of Chemistry, Wayne State University, 5101, Cass Avenue, Detroit, MI, 48202,*

[zwguo@chem.wayne.edu](mailto:zwguo@chem.wayne.edu)

### Table of Contents:

|                                                                                                                    |    |
|--------------------------------------------------------------------------------------------------------------------|----|
| 1. Solid-Phase Synthesis of Peptides <b>1</b> , <b>6</b> , <b>7</b> , and <b>8</b> and Glycopeptide <b>9</b> ..... | 1  |
| 2. SrtA-Mediated Reactions for the Synthesis of Macrocyclic Peptides and<br>Glycopeptides .....                    | 5  |
| 3. MALDI-TOF MS Spectra of Enzymatic Peptide and Glycopeptide Products ...                                         | 11 |

### 1. Synthesis of Peptides **1**, **6**, **7**, and **8** and Glycopeptide **9**

#### 1.1. Solid-phase Synthesis of Peptides **1**, **6**, **7**, and **8**

Automatic solid-phase peptide synthesis (SPPS) was carried out with a peptide synthesizer on a 0.1 mmol scale, starting from the commercial Wang resin loaded with a serine residue employing standard protocols and Fmoc chemistry. The completed peptides were released from the resin with simultaneous side-chain deprotection using 95% (v/v) trifluoroacetic acid (TFA) in water containing 2.5% (v/v) of triethylsilane (Et<sub>3</sub>SiH). All of the products were purified by HPLC and characterized by MALDI-TOF MS (Figures 1-4). **1**, calcd for C<sub>60</sub>H<sub>101</sub>N<sub>17</sub>O<sub>24</sub>: 1443.7, observed 1445.1 [M+H]<sup>+</sup>; **6**, calcd for C<sub>62</sub>H<sub>104</sub>N<sub>18</sub>O<sub>25</sub>: 1500.7, observed 1501.3 [M+H]<sup>+</sup>; **7**, calcd for C<sub>64</sub>H<sub>107</sub>N<sub>19</sub>O<sub>26</sub>: 1557.8, observed 1558.3 [M+H]<sup>+</sup>; **8**, calcd for C<sub>66</sub>H<sub>110</sub>N<sub>20</sub>O<sub>27</sub>: 1614.8, observed 1615.5 [M+H]<sup>+</sup>

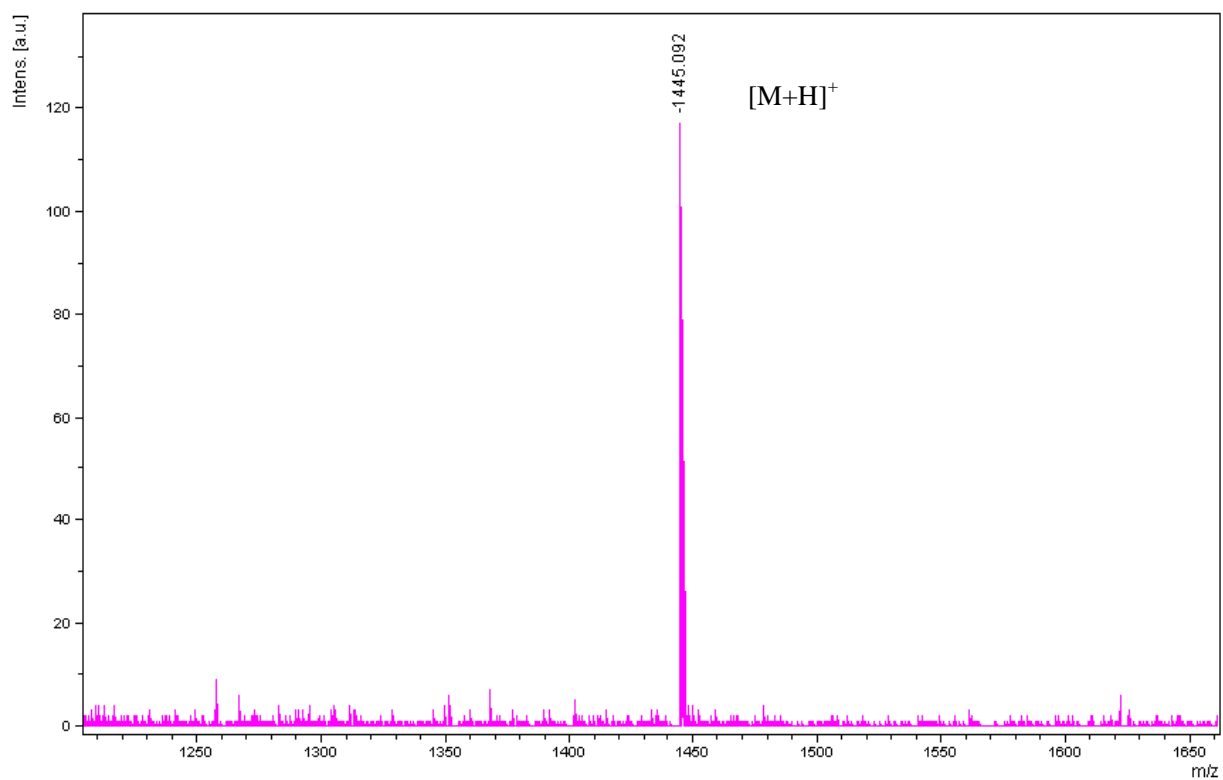

**Figure 1.** MALDI-TOF MS of **1**

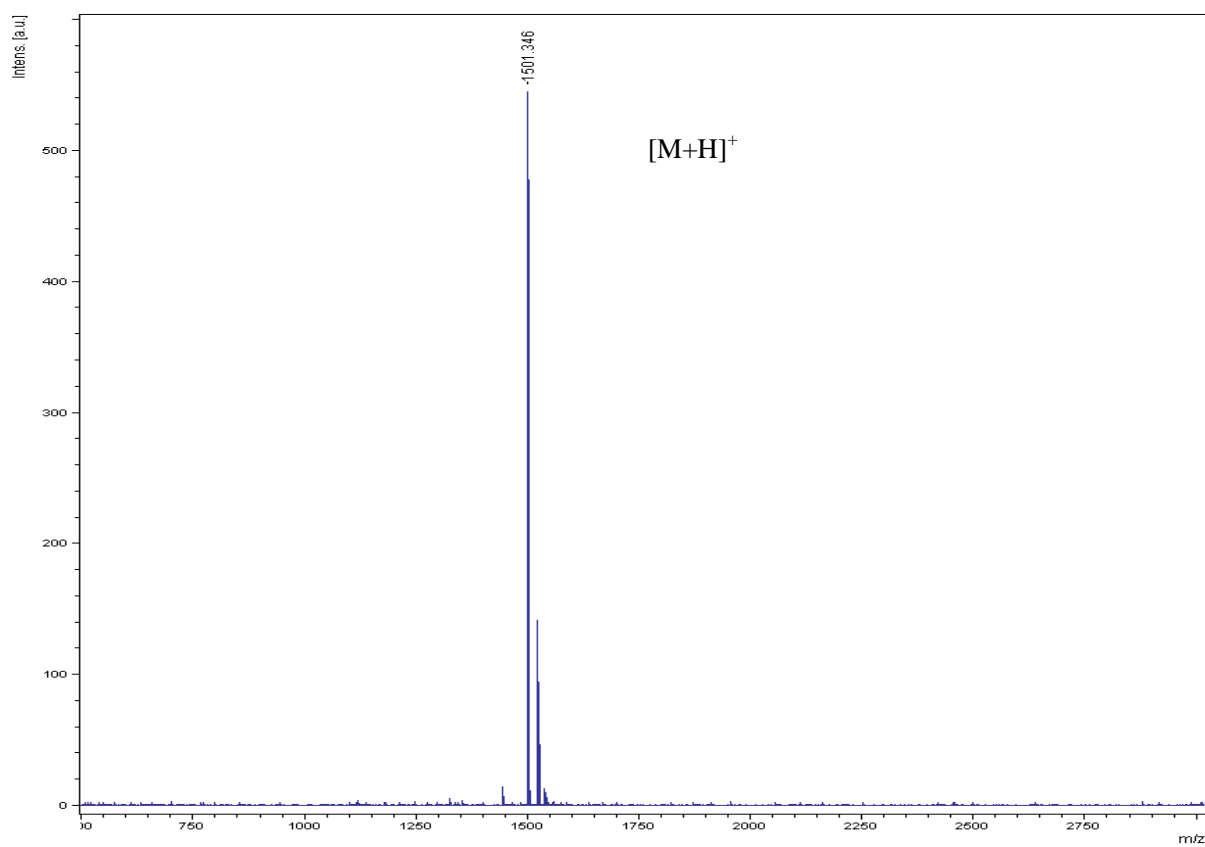

**Figure 2.** MALDI-TOF MS of **6**

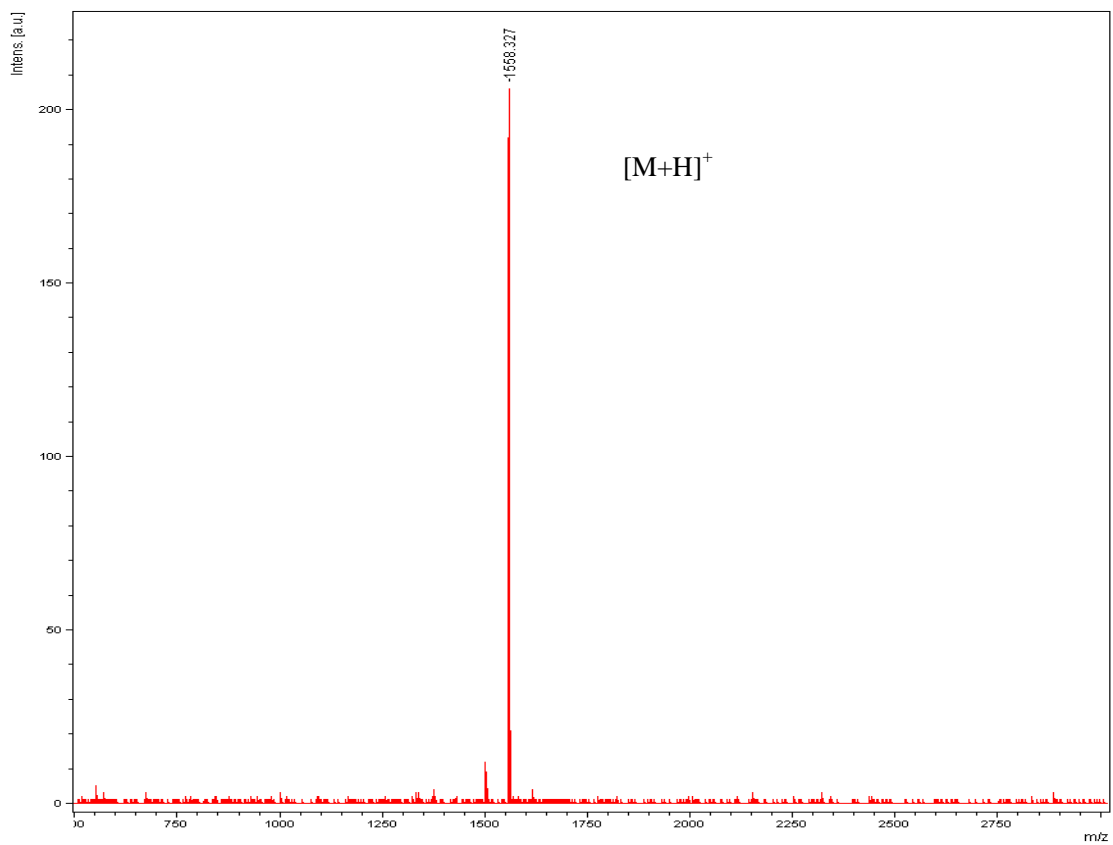

**Figure 3.** MALDI-TOF MS of **7**

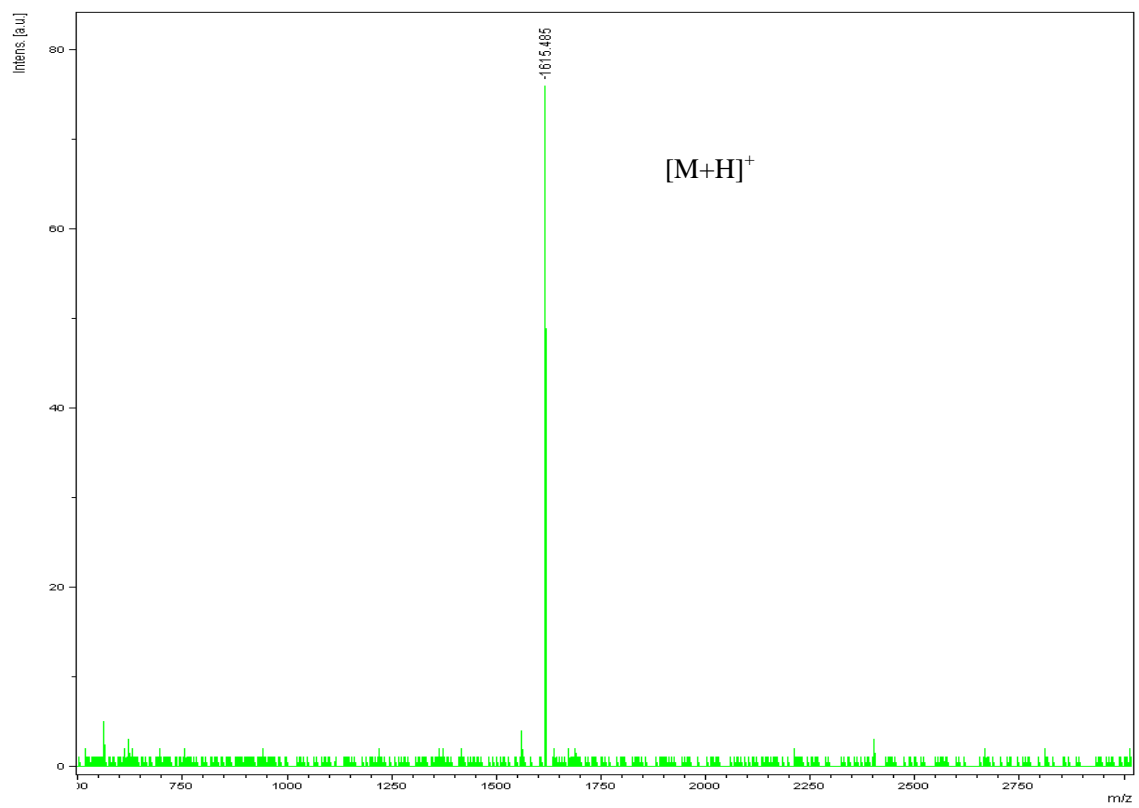

**Figure 4.** MALDI-TOF MS of **8**

## 1.2. Solid-Phase Synthesis of Glycopeptide **9**

Glycopeptide **9** was prepared according to our previously reported method (Wu, Z. M.; Guo, X. Q.; Guo, Z. W., *Chem Commun* **2010**, *46*, 5773-5774). After the glycopeptide assembly on the resin was finished, the *N*-terminal Fmoc was removed by 10% of piperidine. Then, the resin was treated with 95% aq. TFA containing 2.5% Et<sub>3</sub>SiH at rt for 2 h to release acetylated glycopeptide **13**, which was characterized with MALDI-TOF MS [Figure 5, calcd for C<sub>102</sub>H<sub>158</sub>N<sub>20</sub>O<sub>48</sub> (m/z) 2431.1, observed 2432.3 (M + H)<sup>+</sup>]. Glycopeptide **13** was dissolved in MeOH, to which was added 0.1 M solution of NaOMe in MeOH to adjust the pH to *ca.* 8.0. The reaction progress was monitored by MALDI-TOF. After the reaction was finished, it was neutralized by addition of acetic acid. The solvent was removed in *vacuum*, and the residue was dissolved in water and purified by preparative RP-HPLC (20% to 50% MeCN in H<sub>2</sub>O, both containing 0.1% TFA) to afford **9** as a white solid, which was characterized with MALDI-TOF MS [Figure 6, calcd for C<sub>84</sub>H<sub>140</sub>N<sub>20</sub>O<sub>39</sub> (m/z) 2052.9, observed 2054.0 (M + H)<sup>+</sup>].

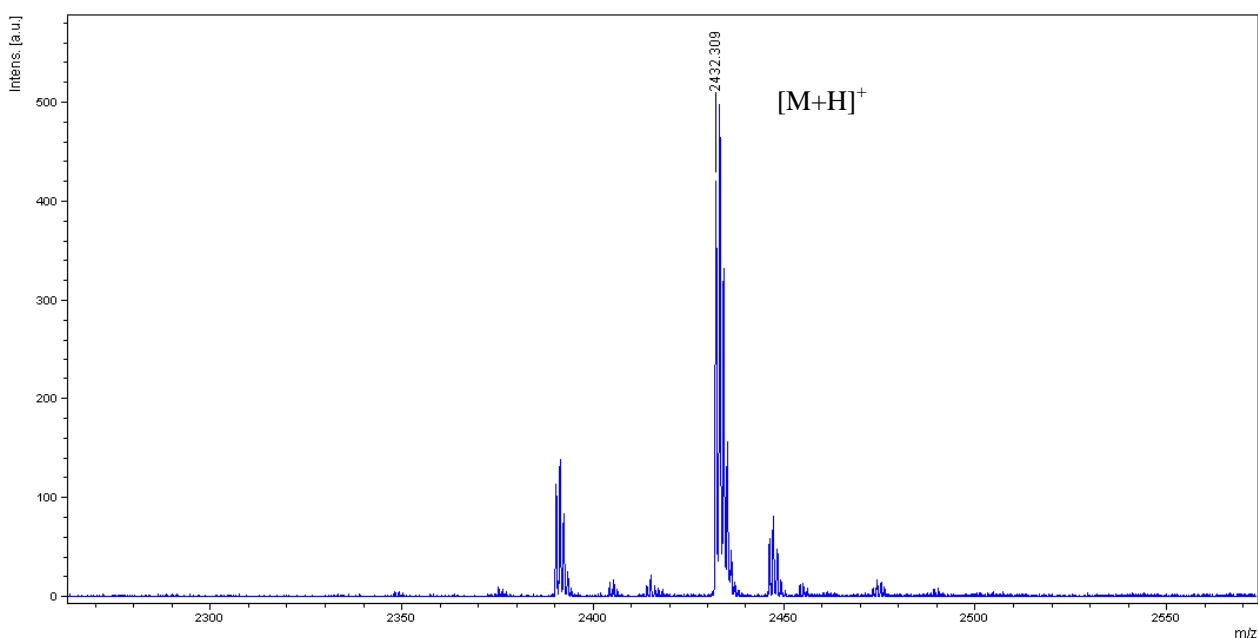

**Figure 5.** MALDI-TOF MS of **13**

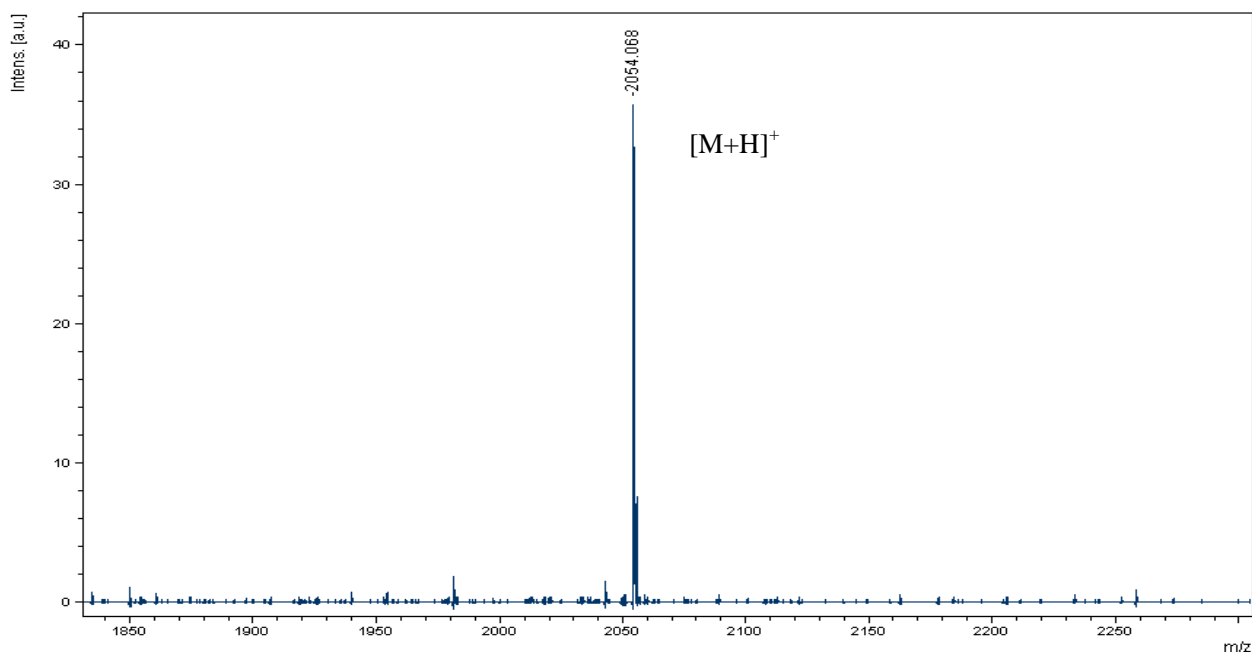

**Figure 6.** MALDI-TOF MS of **9**

## 2. SrtA-Catalyzed Peptide Oligomerization and Cyclization Reactions

### 2.1 SrtA-catalyzed reactions of **1** in the presence of different concentrations of SrtA

The reaction was performed in 100  $\mu$ L solution with fixed concentration of peptide **1** (0.5 mM) and different concentrations of SrtA (10, 20, 40, and 60  $\mu$ M) in 0.3 M Tris-HCl buffer (pH = 7.5) containing 0.15 M NaCl, 5 mM  $\text{CaCl}_2$ , and 2 mM 2-mercaptoethanol. After the reaction was kept at 37  $^\circ\text{C}$  for 20 h, 20  $\mu$ L of the reaction mixture was withdrawn and quenched with the same volume of 0.1% of TFA. The aliquots were then analyzed by HPLC using a RP C18 column (Figure 7) and the fractions were analyzed by MALDI-TOF MS (Figures 11-14).

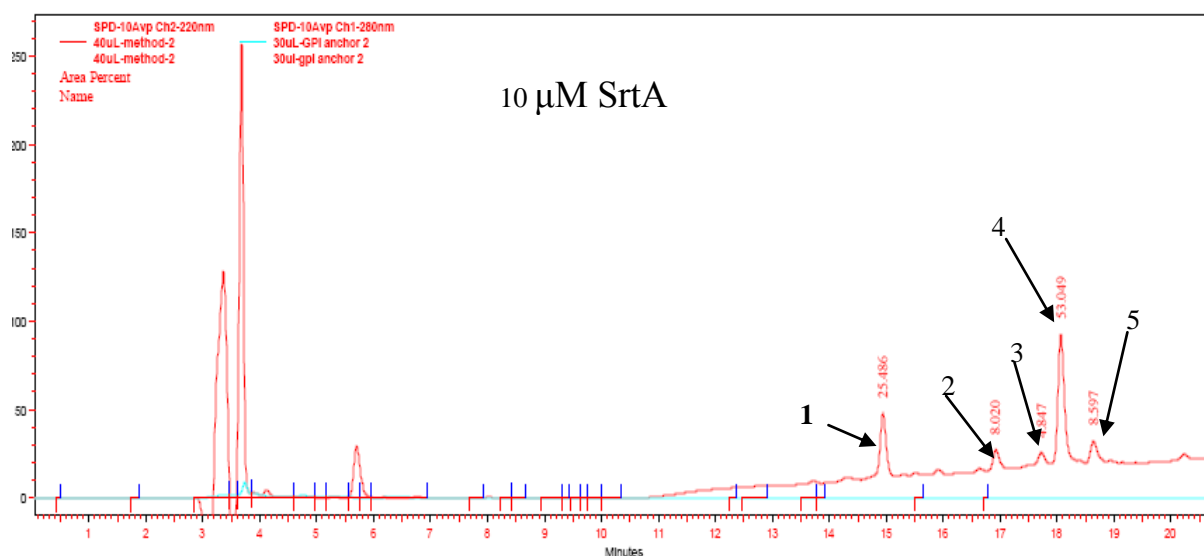

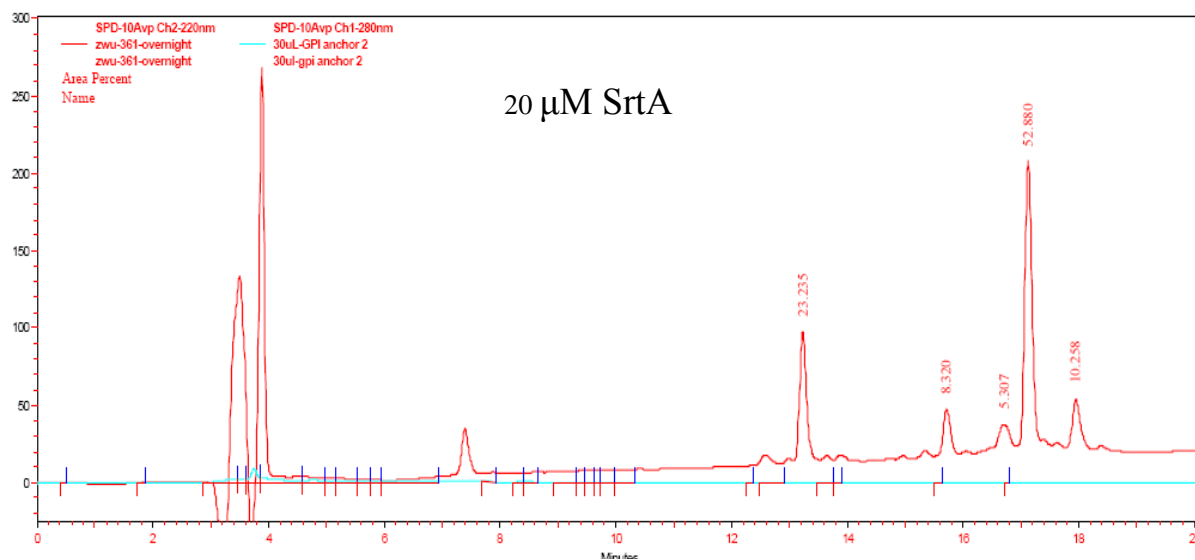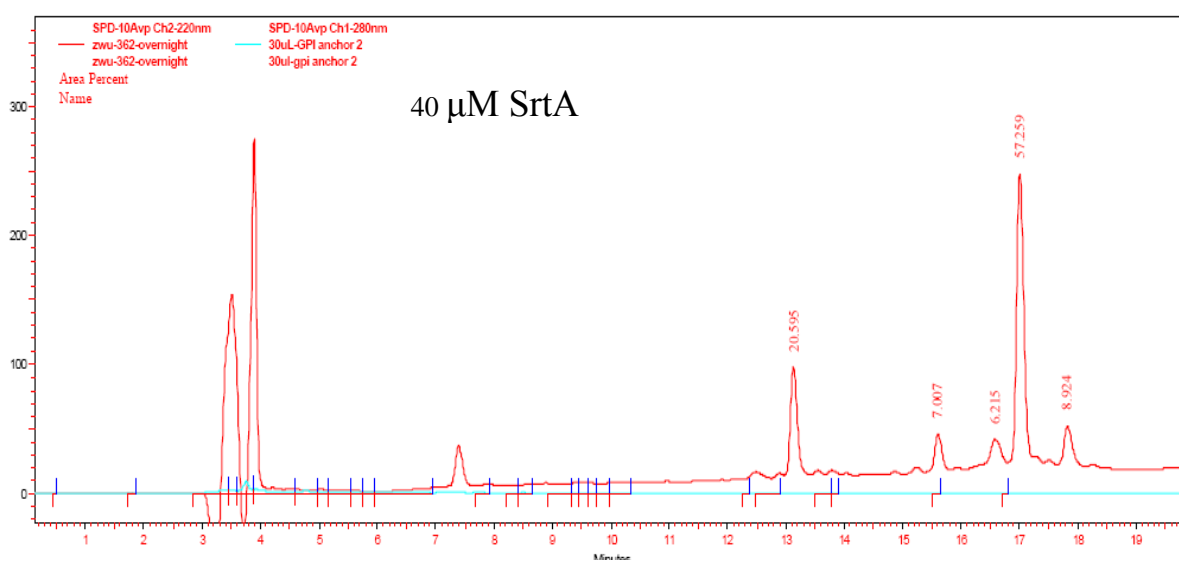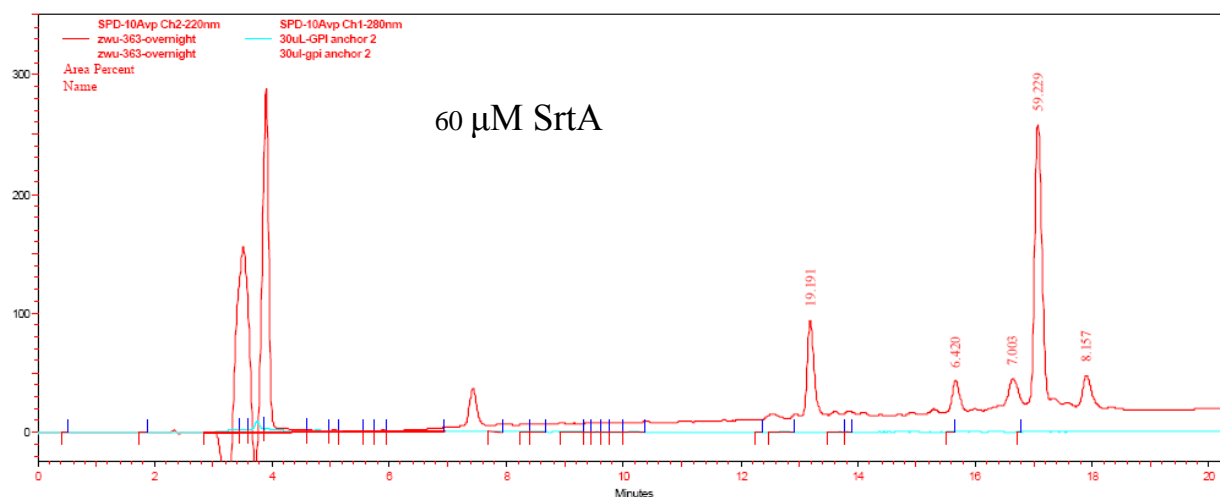

**Figure 7.** HPLC diagrams of the reactions of **1** in the presence of different concentrations of SrtA. Monitored with UV at 220 nm. Eluent: 10% to 40% MeCN in H<sub>2</sub>O (both containing 0.1% TFA) in 15 min; flow rate: 1 mL/min; column: C-18 (250 x 4.6 mm).

## 2.2 SrtA-catalyzed reactions of different concentrations of **1**

The reaction was performed in 100  $\mu$ L solution with a fixed concentration of SrtA (40  $\mu$ M) and different concentrations of **1** (0.1, 0.25, 0.5, 1, 2.5, 5, and 10 mM). Reactions were carried out in 0.3 M Tris-HCl buffer (pH = 7.5) containing 0.15 M NaCl, 5 mM CaCl<sub>2</sub>, and 2 mM 2-mercaptoethanol. After the reaction was incubated at 37 °C for 20 h, 20  $\mu$ L of the reaction mixture was taken and then quenched with the same volume of 0.1% of TFA. The aliquots were analyzed by HPLC using a RP C18 column (Figure 8), and the fractions were analyzed by MALDI-TOF MS (Figures 11-14).

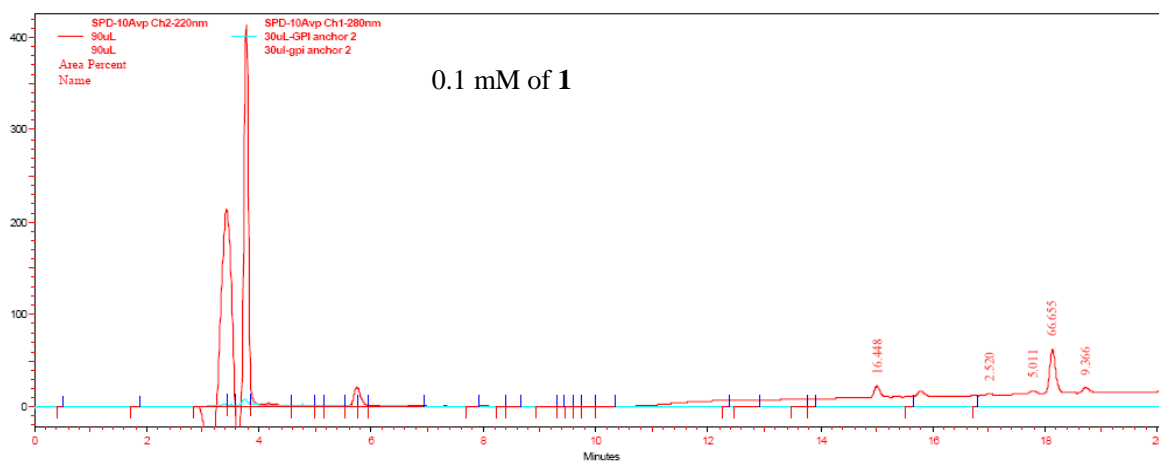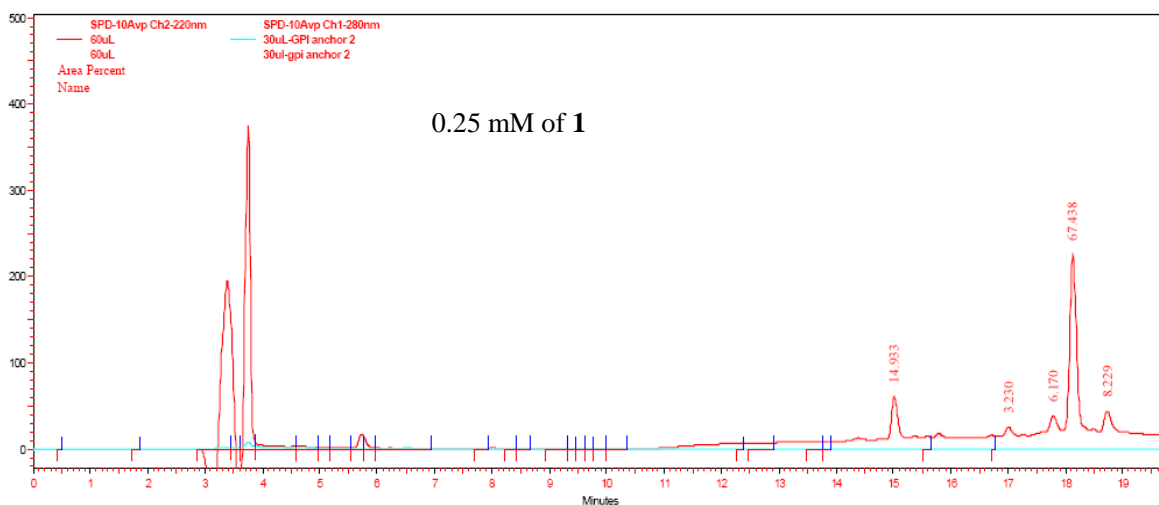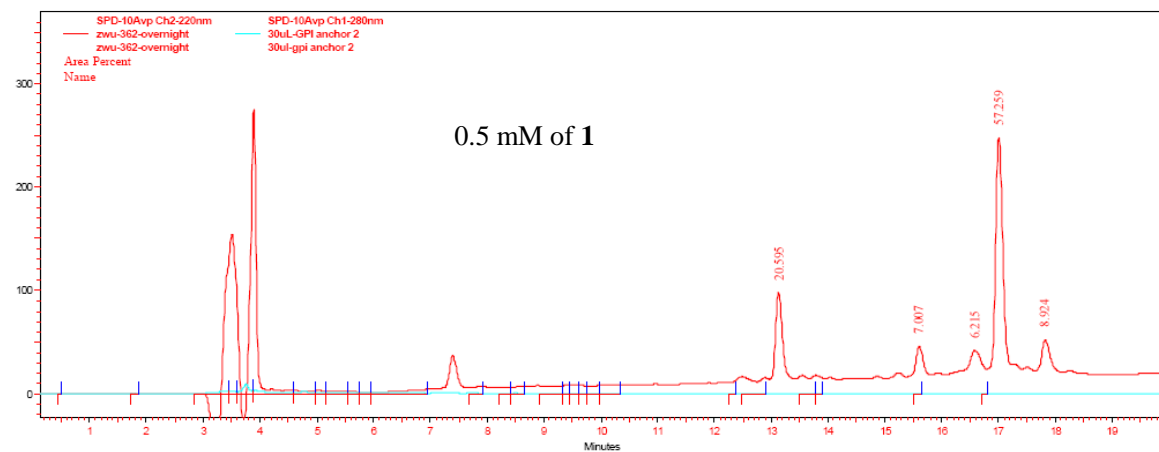

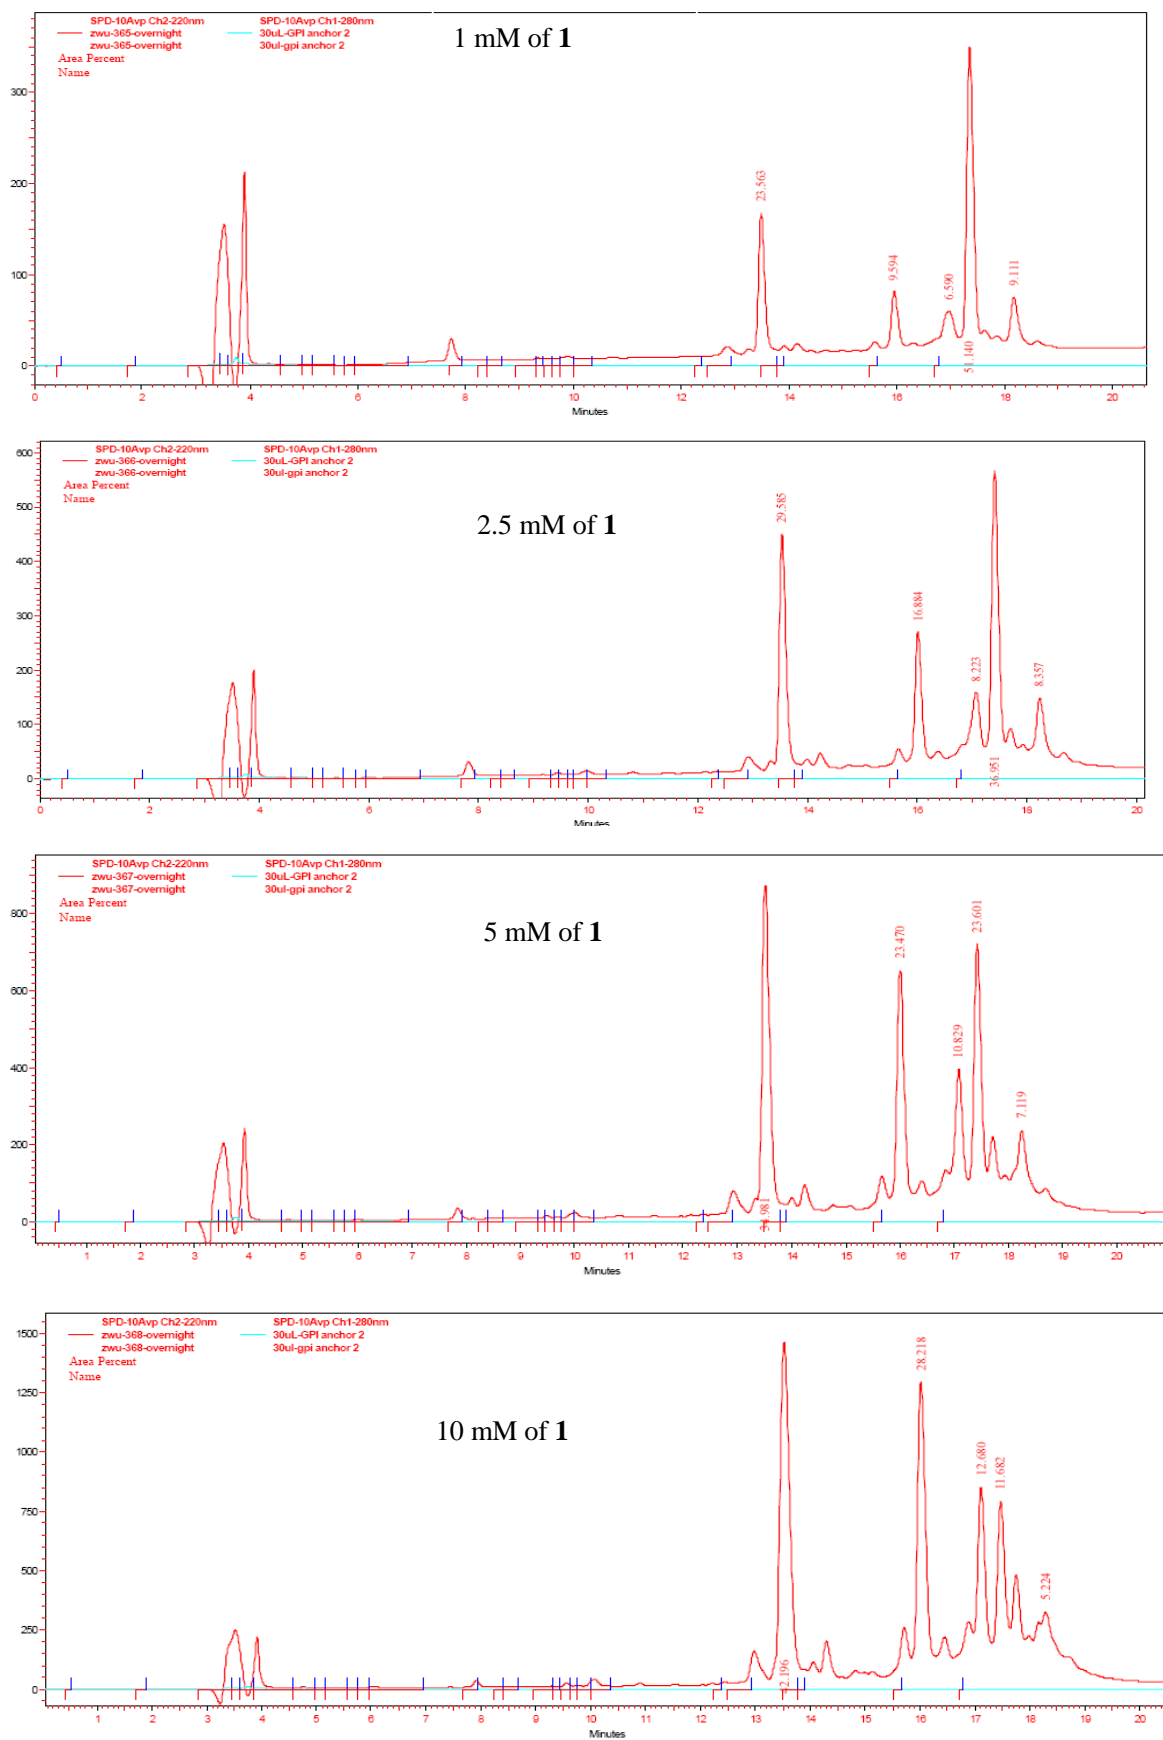

**Figure 8.** HPLC diagrams of the reactions of different concentrations of **1** in the presence of 40  $\mu$ M SrtA. Monitored with UV at 220 nm. Eluent: 10% to 40% MeCN in H<sub>2</sub>O (both containing 0.1% TFA) in 15 min; flow rate: 1 mL/min; column: C-18 (250 x 4.6 mm).



### 2.3 SrtA-catalyzed oligomerization and cyclization reactions of **6**, **7**, and **8**

The reactions were performed in 100  $\mu$ L solutions with a fixed concentration of SrtA (40  $\mu$ M) and 0.5 mM of peptide **6**, **7** or **8** in 0.3 M Tris-HCl buffer (pH = 7.5) containing 0.15 M NaCl, 5 mM CaCl<sub>2</sub>, and 2 mM 2-mercaptoethanol. The reaction conditions and workup procedures were identical to that used in the reactions of **1**. The reaction aliquots were analyzed by HPLC with a RP C18 column (Figure 9), and fractions were analyzed by MALDI-TOF MS (Figures 15-24).

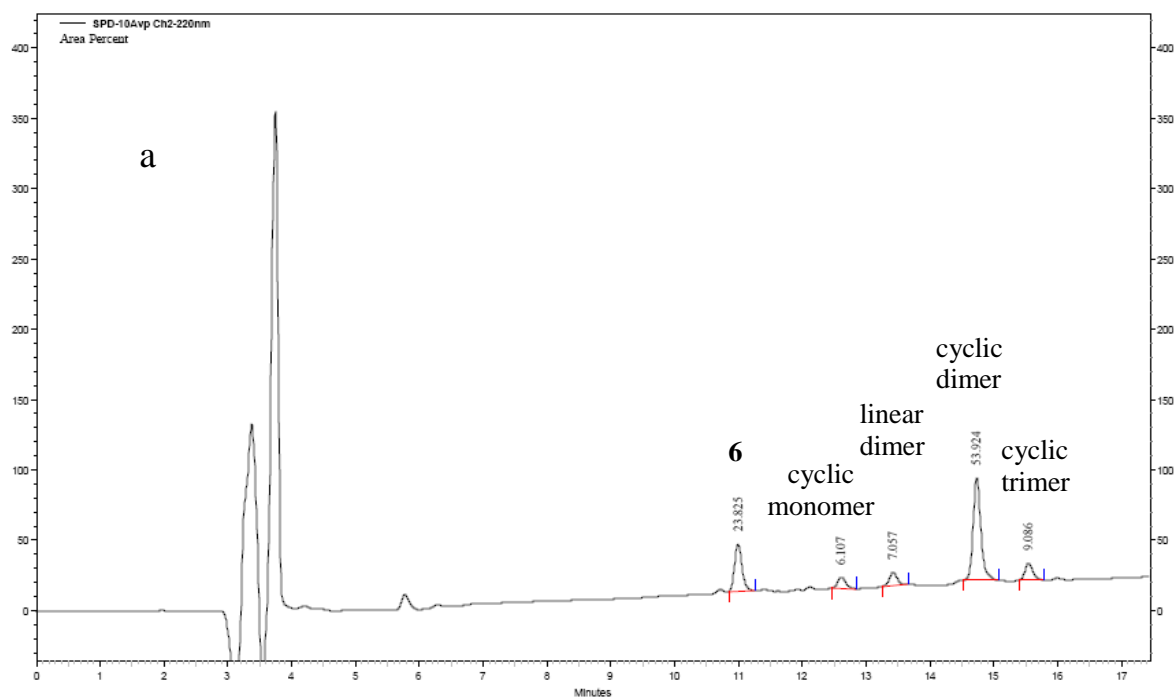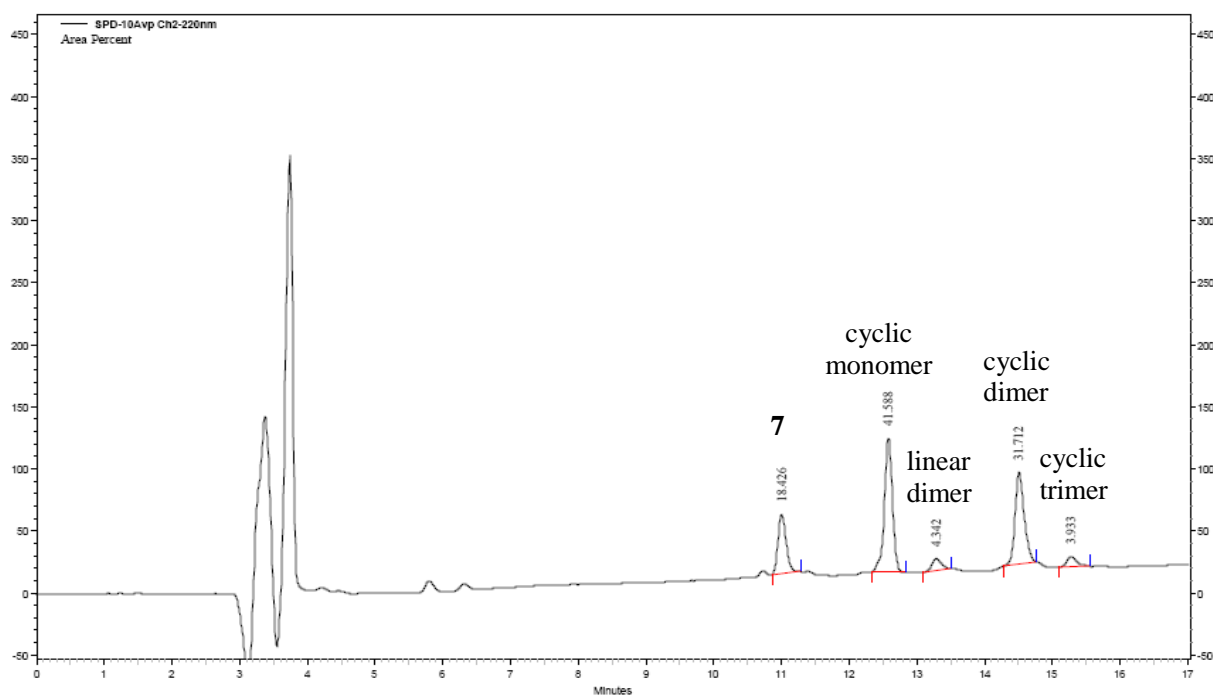

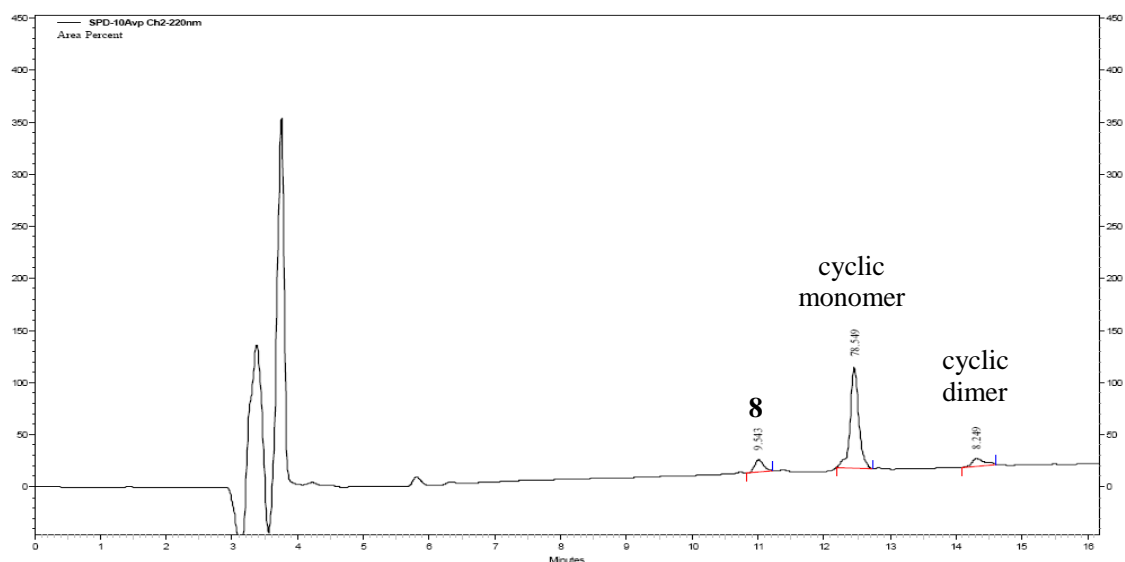

**Figure 9.** HPLC diagrams of reactions of **6**, **7**, and **8** in the presence of 40  $\mu$ M of SrtA. Monitored with UV at 220 nm. Eluent: 10% to 40% MeCN in H<sub>2</sub>O (both containing 0.1% TFA) in 15 min; flow rate: 1 mL/min; column: C-18 (250 x 4.6 mm).

#### 2.4 SrtA-catalyzed oligomerization and cyclization reactions of glycopeptide **9**

The reaction was performed at the optimized conditions with the concentrations of **9** at 0.25 mM and SrtA at 20  $\mu$ M. After incubation at 37 °C for 20 h, 20  $\mu$ L of the reaction mixture was taken and quenched with the same volume of 0.1% of TFA. The aliquots were analyzed by HPLC with a C18 column (Figure 10), and the fractions were analyzed by MALDI-TOF MS (Figures 25-27).

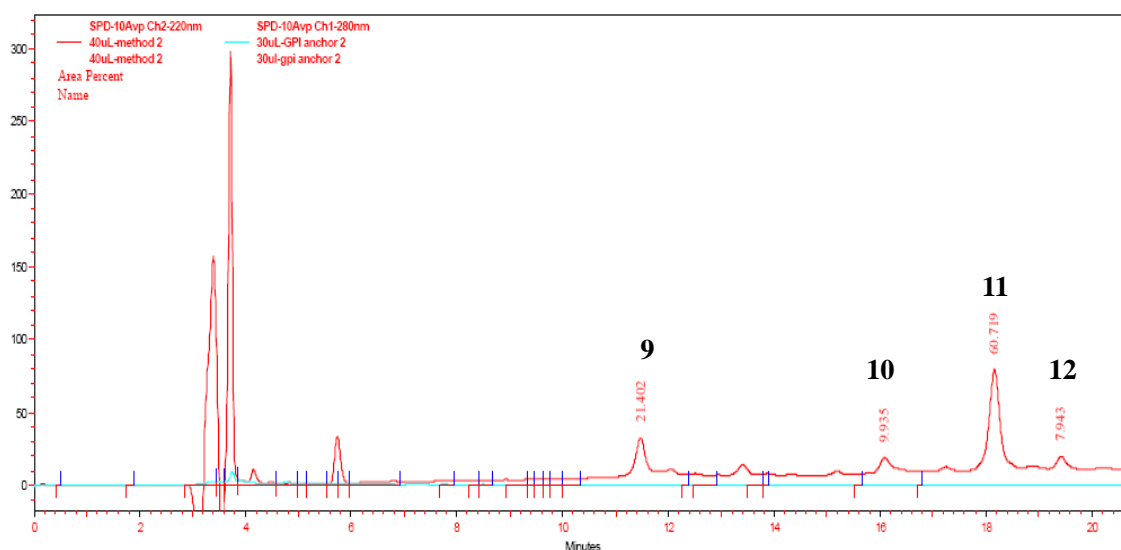

**Figure 10.** HPLC diagram of the reaction of **9** in the presence of 40  $\mu$ M of SrtA. Monitored with UV at 220 nm. Eluent: 10% to 40% MeCN in H<sub>2</sub>O (both containing 0.1% TFA) in 15 min; flow rate: 1 mL/min; column: C-18 (250 x 4.6 mm).

### 3. MALDI-TOF MS of Cyclic Peptide and Glycopeptide Products

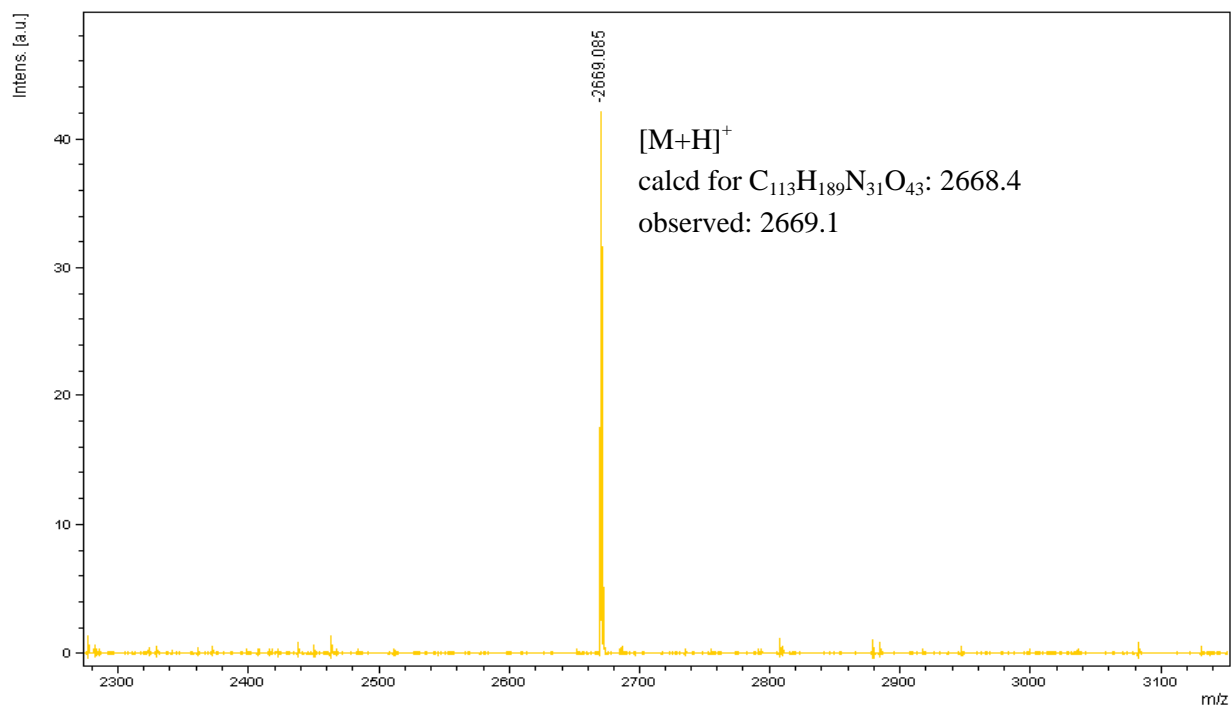

**Figure 11.** MALDI-TOF MS of purified **2**

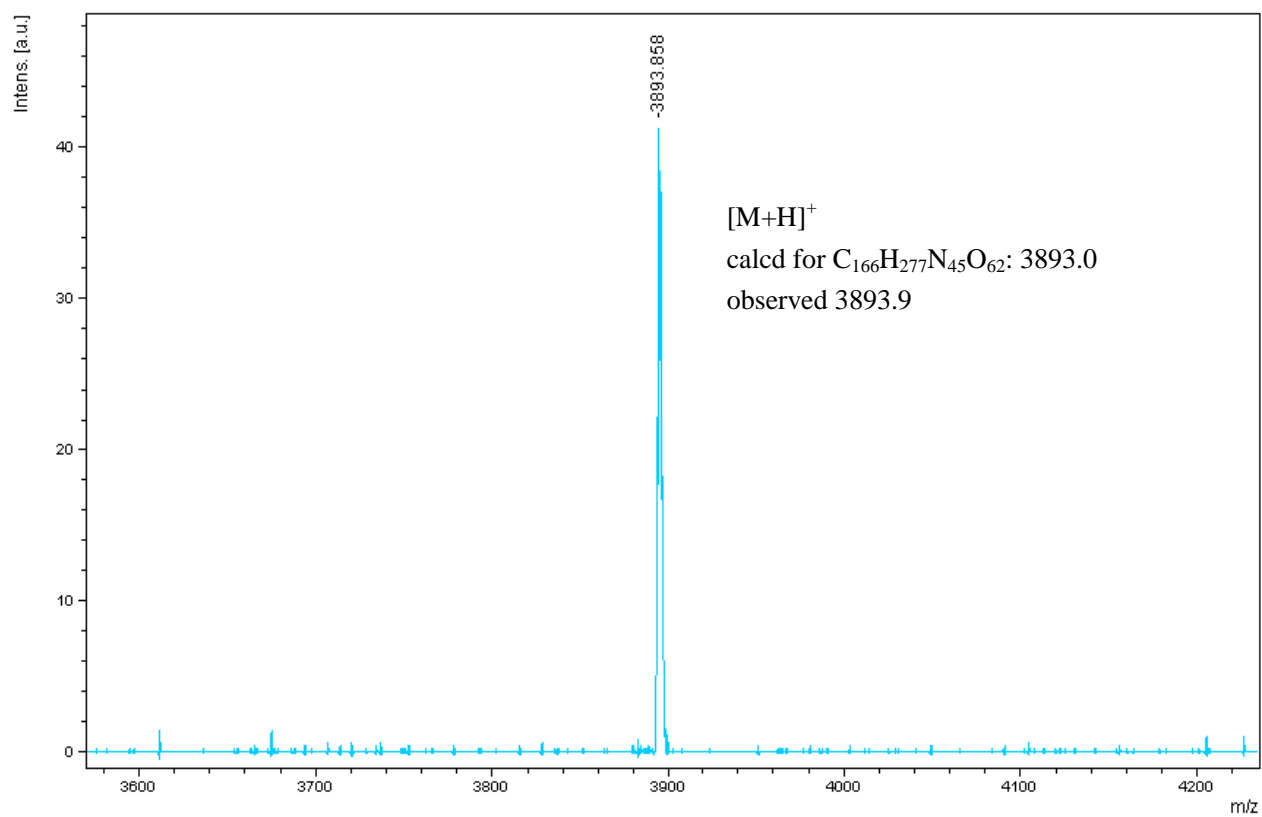

**Figure 12.** MALDI-TOF MS of purified **3**

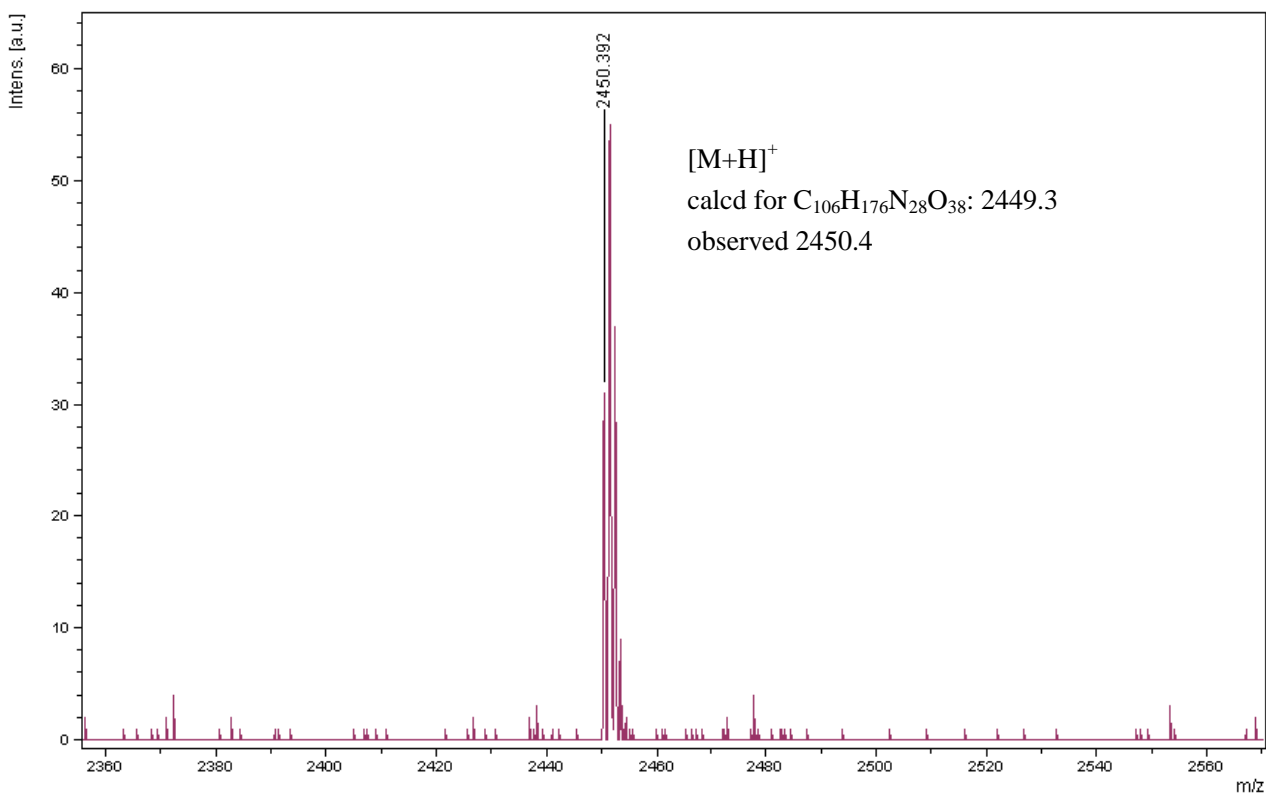

**Figure 13.** MALDI-TOF MS of purified **4**

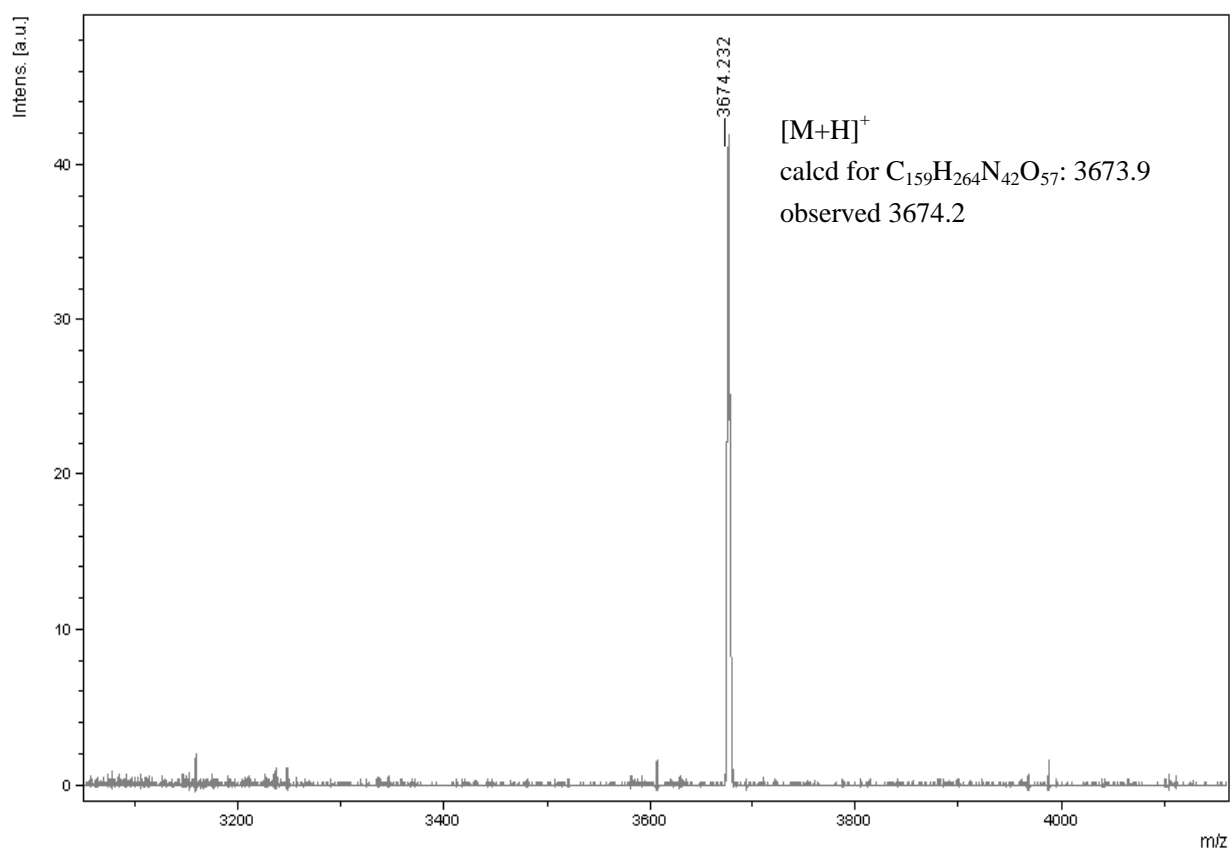

**Figure 14.** MALDI-TOF MS of purified **5**

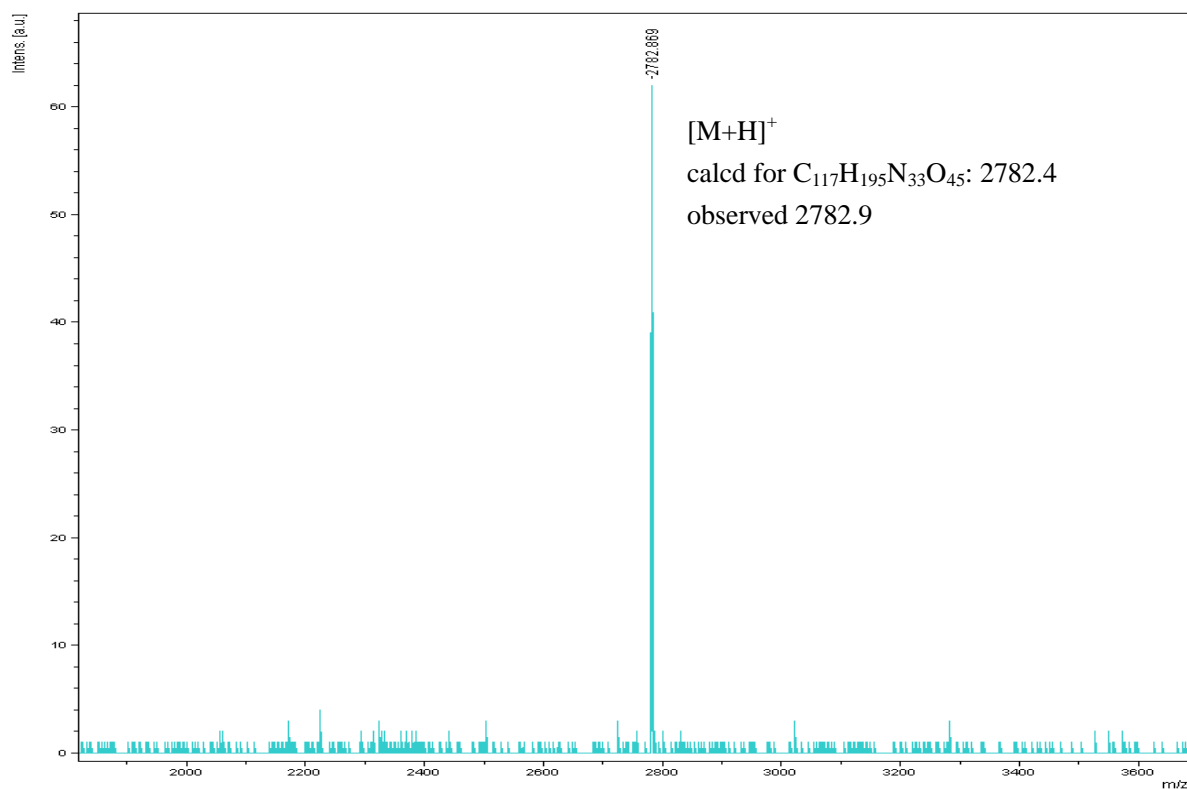

**Figure 15.** MALDI-TOF MS of purified linear dimer of **6**

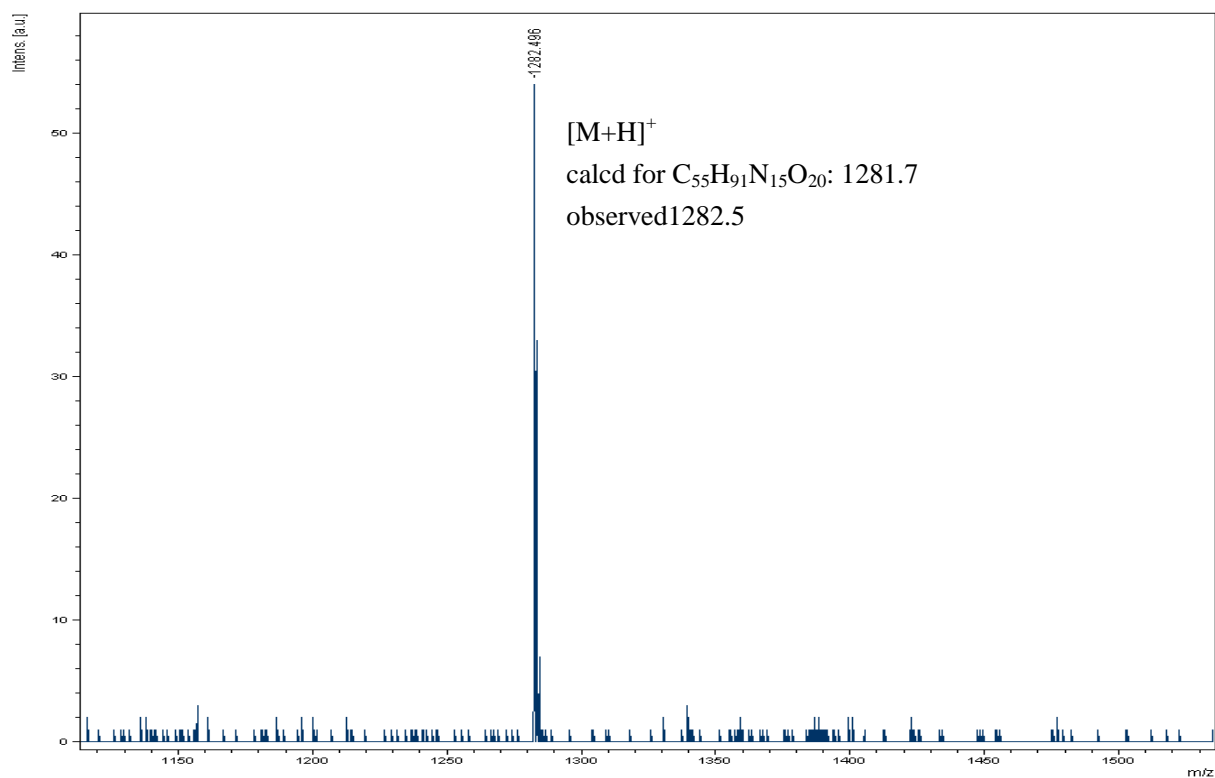

**Figure 16.** MALDI-TOF MS of purified cyclic monomer of **6**

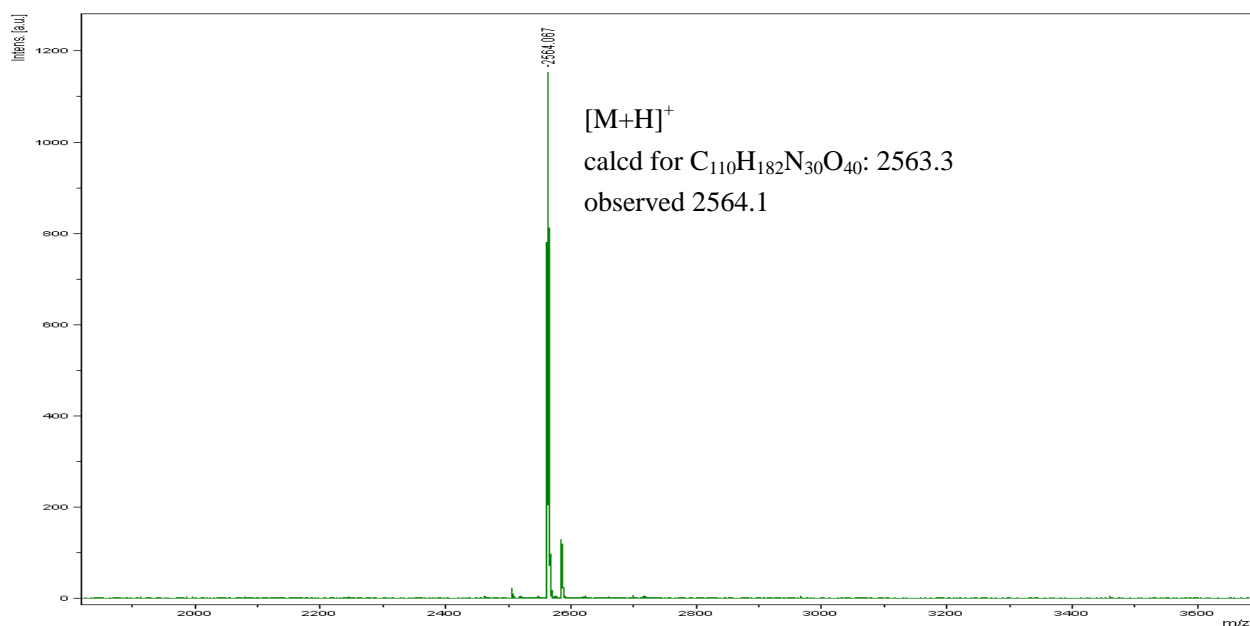

**Figure 17.** MALDI-TOF MS of purified cyclic dimer of **6**

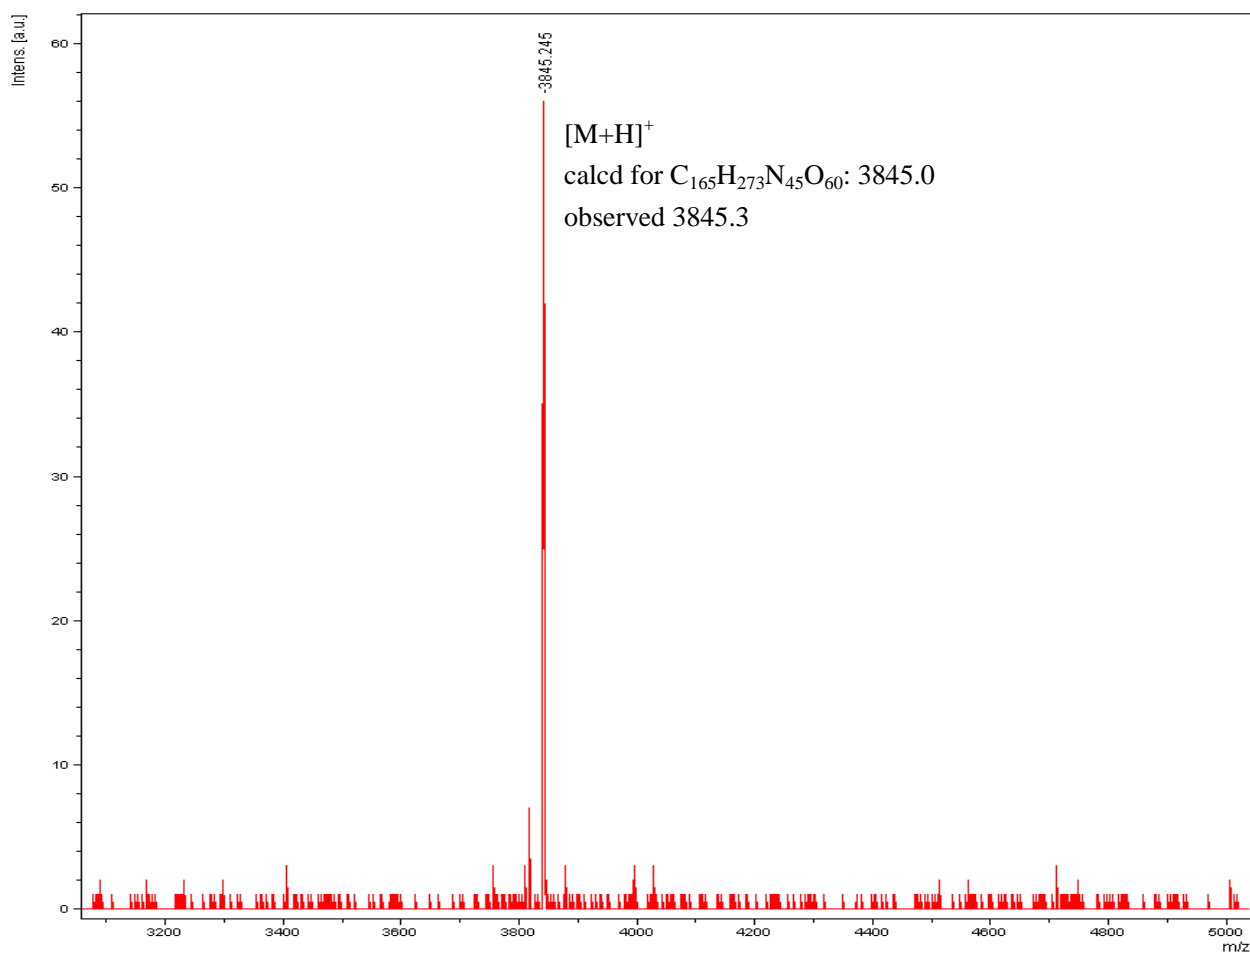

**Figure 18.** MALDI-TOF MS of purified cyclic trimer of **6**

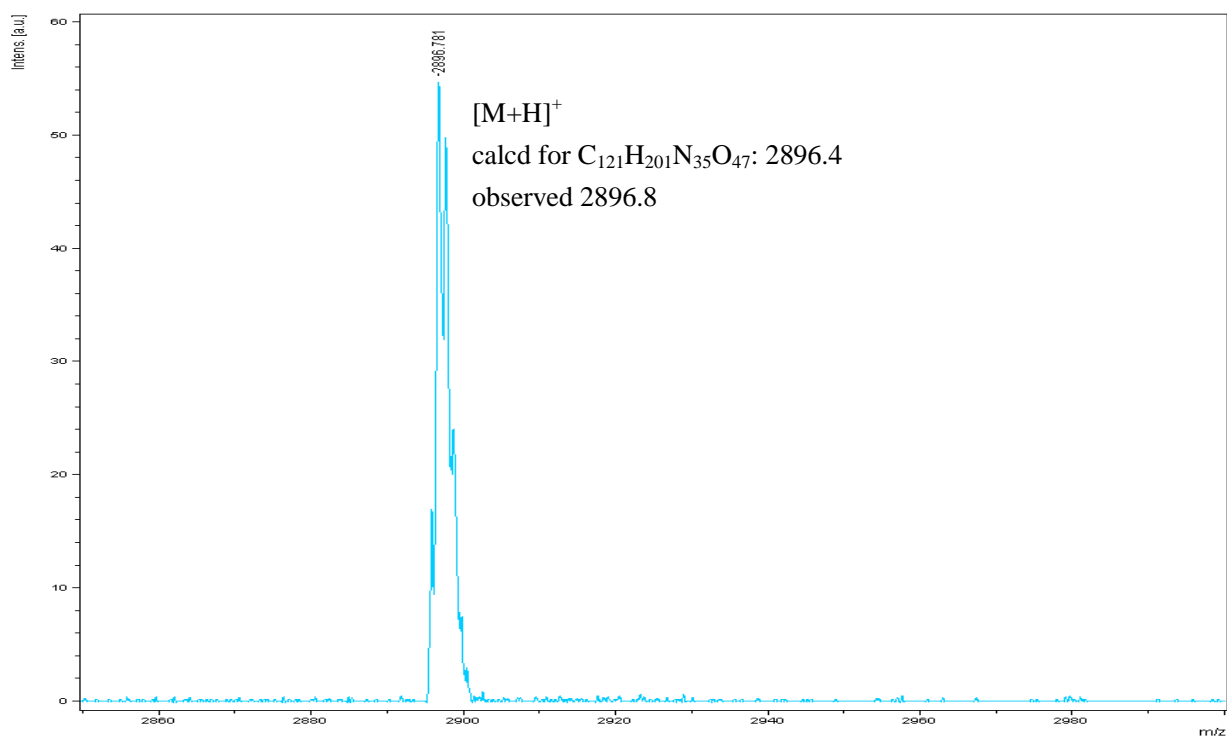

**Figure 19.** MALDI-TOF MS of purified linear dimer of **7**

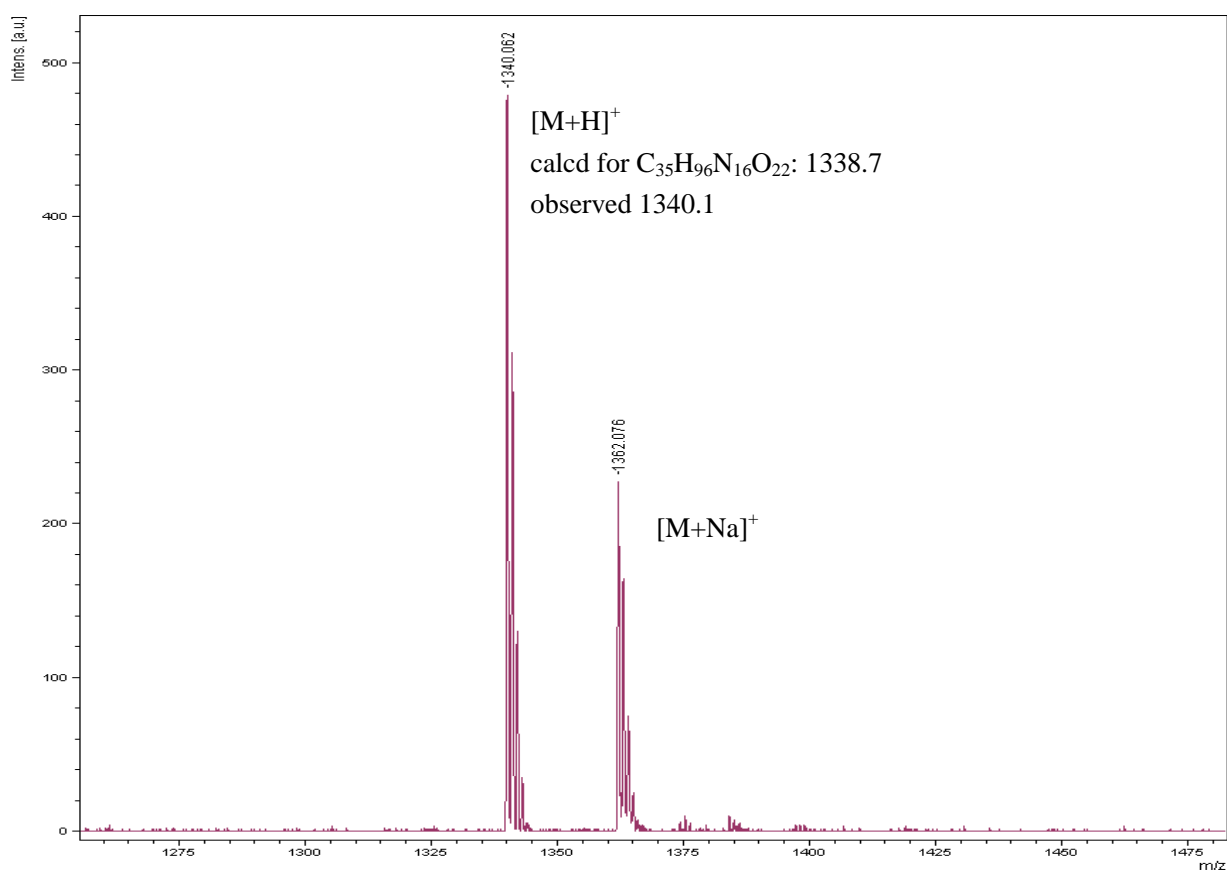

**Figure 20.** MALDI-TOF MS of purified cyclic monomer of **7**

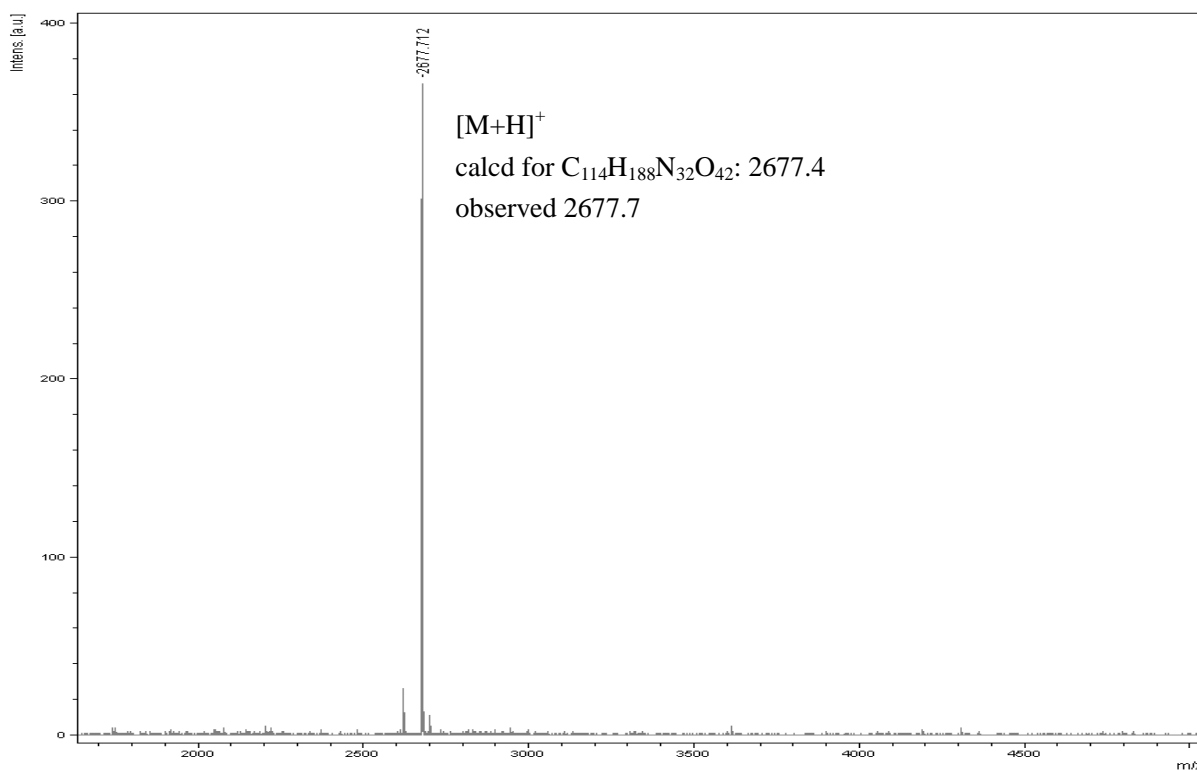

**Figure 21.** MALDI-TOF MS of purified cyclic dimer of **7**

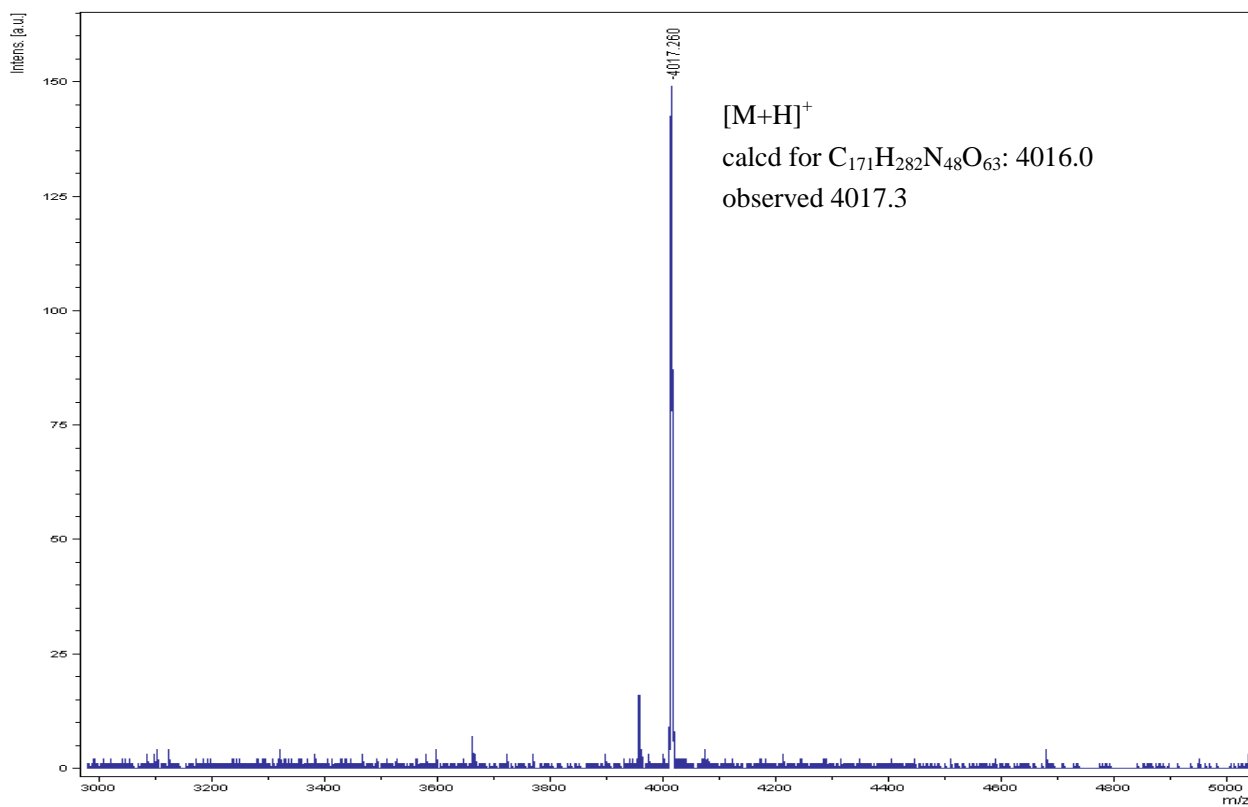

**Figure 22.** MALDI-TOF MS of purified cyclic trimer of **7**



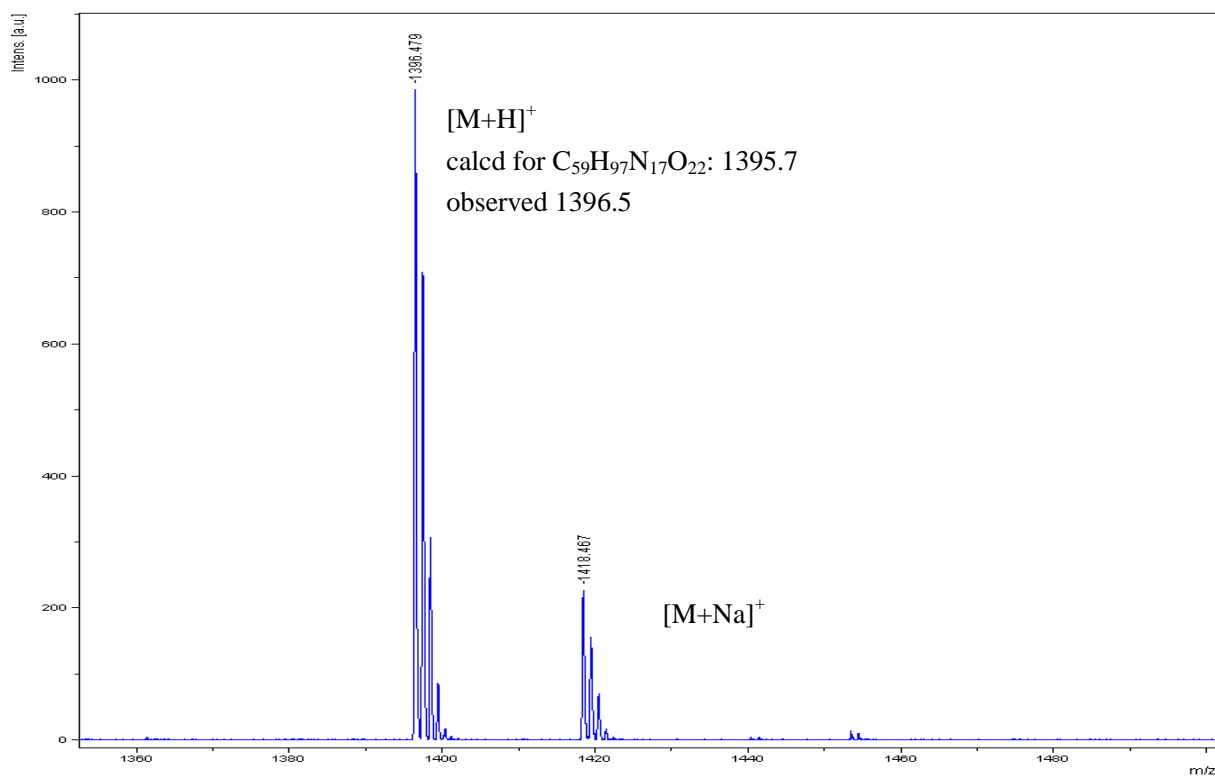

**Figure 23.** MALDI-TOF MS of purified cyclic monomer of **8**

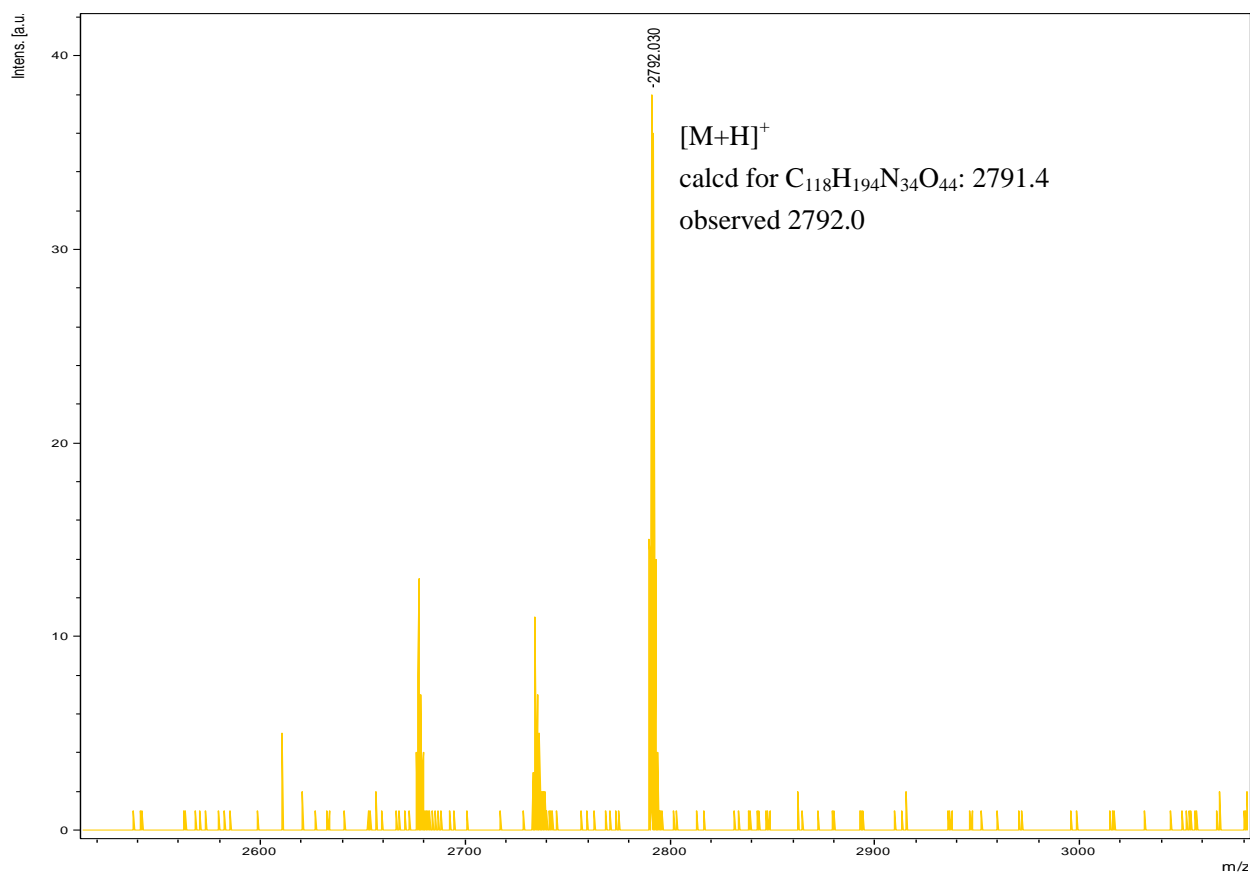

**Figure 24.** MALDI-TOF MS of purified cyclic dimer of **8**

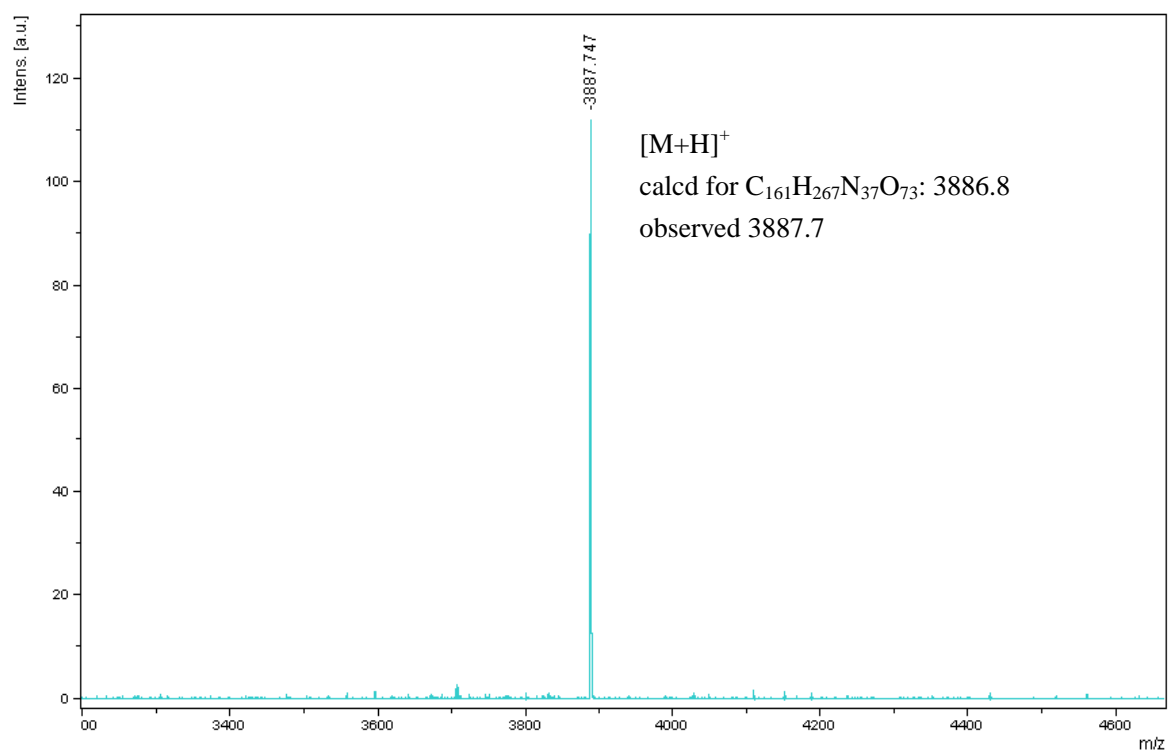

**Figure 25.** MALDI-TOF MS of purified **10**

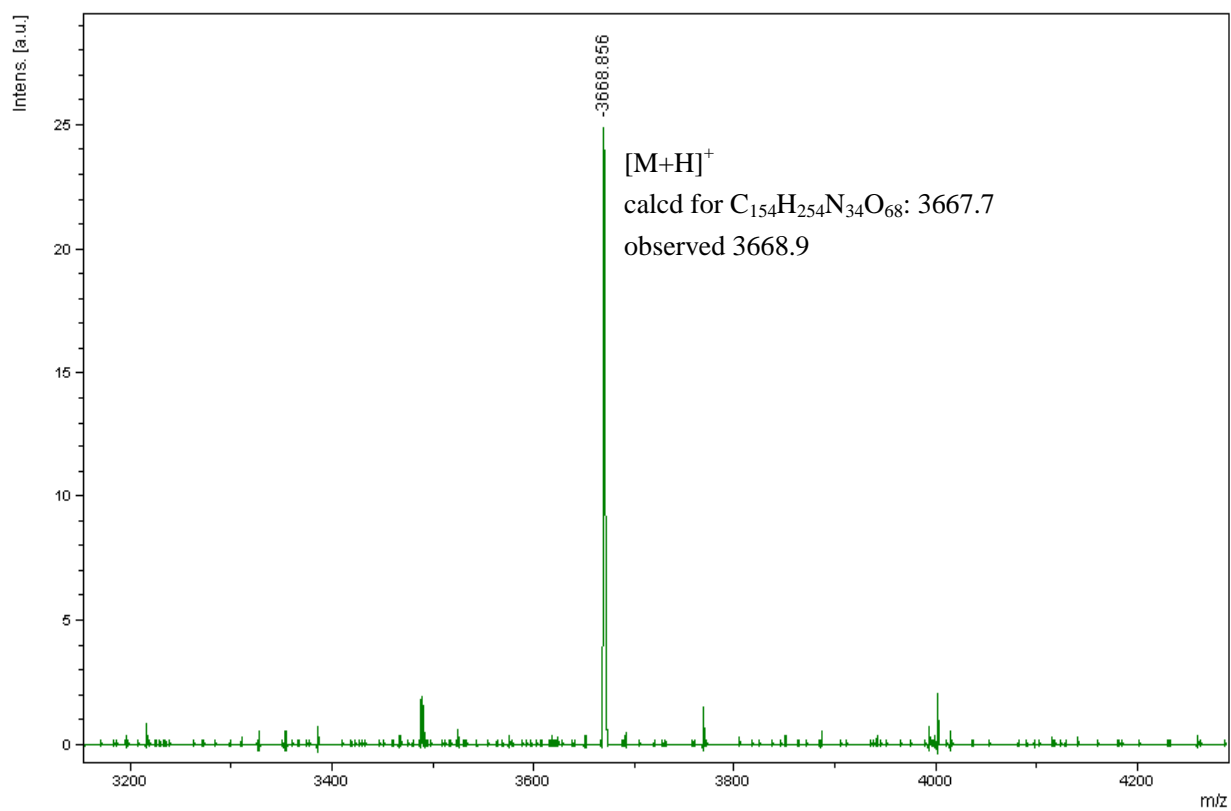

**Figure 26.** MALDI-TOF MS of purified **11**

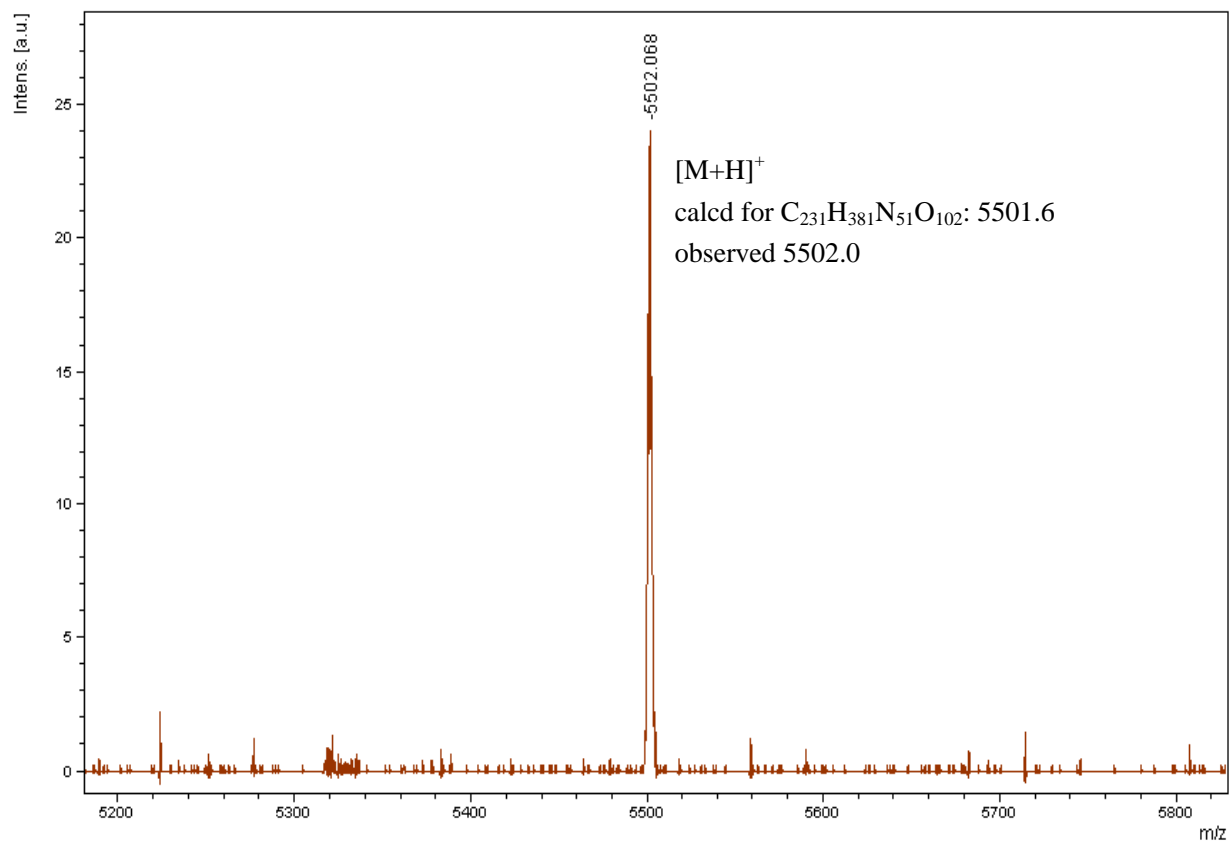

**Figure 27.** MALDI-TOF MS of purified **12**
